# Supplementary material for: Tailoring thin film transistor performance through plasma reactant manipulation in indium oxynitride films
Source: Royal Society of Chemistry journal article supplement (doi:10.1039/d3tc02835f), 2023-01-01
Supplement: d3tc02835f1.pdf [file d3tc02835f1.pdf]

## Supporting Information

### **Tailoring Thin Film Transistor Performance through Plasma Reactant Manipulation in Indium Oxynitride Films**

*Hyun-Mo Lee, Hye-Mi Kim, Yoon-seo Kim, and Jin-Seong Park\**

Hyun-Mo Lee, Hye-Mi Kim, Yoon-seo Kim, and Jin-Seong Park

Division of Materials Science and Engineering, Hanyang University, Seoul, 04763, Republic of Korea

E-mail: [jsparklime@hanyang.ac.kr](mailto:jsparklime@hanyang.ac.kr)

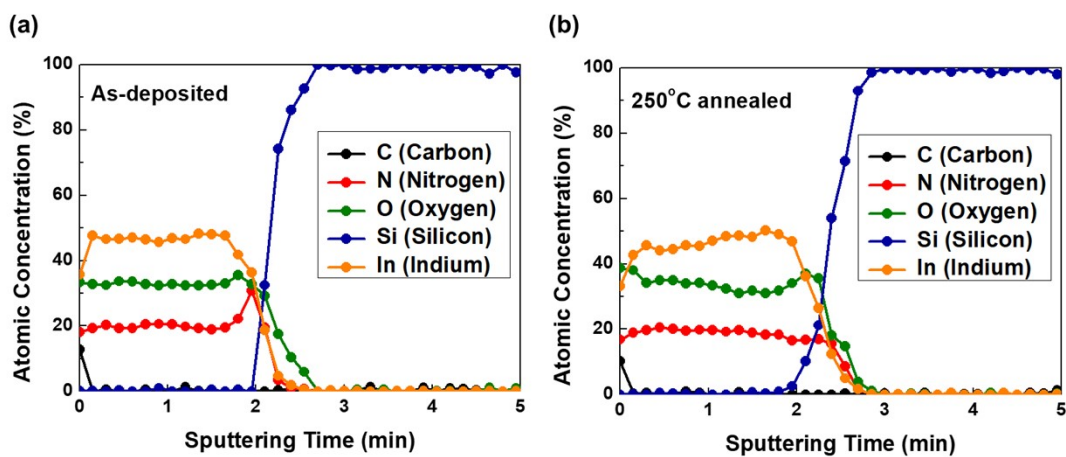

**Figure S1.** Atomic concentration profiling as a function of depth of InON thin films depending on the temperature of post-annealing process (a) as-deposited and (b) 250 °C.

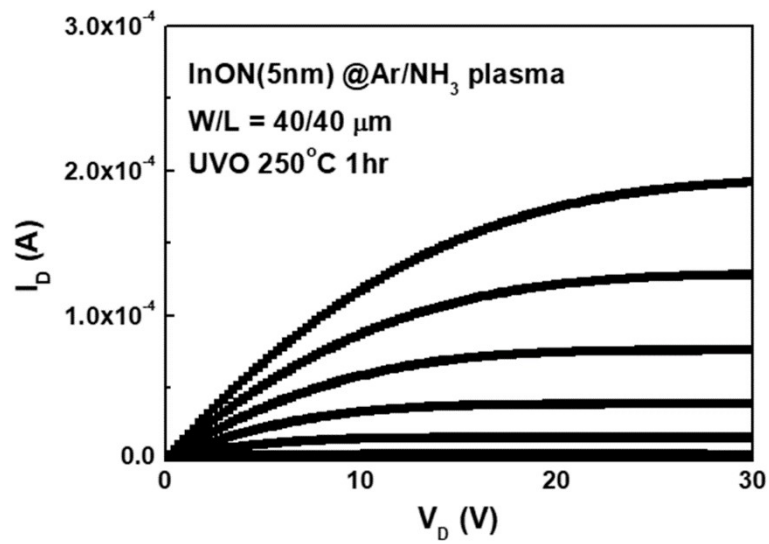

**Figure S2.** The output curve of InON TFTs with NH<sub>3</sub> plasma condition.

|                              | <b>Indium (%)</b> | <b>Oxygen (%)</b> | <b>Nitrogen (%)</b> | <b>Carbon (%)</b> |
|------------------------------|-------------------|-------------------|---------------------|-------------------|
| <b>N<sub>2</sub> plasma</b>  | <b>48.7</b>       | <b>32.4</b>       | <b>18.9</b>         | <b>N/D</b>        |
| <b>NH<sub>3</sub> plasma</b> | <b>54.1</b>       | <b>21.0</b>       | <b>24.9</b>         | <b>N/D</b>        |

**Table S1.** Atomic concentration of InON thin film grown at 250°C with plasma power of 100W respect to different nitrogen source using XPS analysis.

|                              | <b>XRR data<br/>density (g/cm<sup>3</sup>)</b> | <b>O (%)</b> | <b>N (%)</b> | <b>Theoretical<br/>density (g/cm<sup>3</sup>)</b> | <b>Difference (%)</b> |
|------------------------------|------------------------------------------------|--------------|--------------|---------------------------------------------------|-----------------------|
| <b>N<sub>2</sub> plasma</b>  | <b>6.58</b>                                    | <b>30.4</b>  | <b>21.8</b>  | <b>7.03</b>                                       | <b>-6.34</b>          |
| <b>NH<sub>3</sub> plasma</b> | <b>6.86</b>                                    | <b>19.7</b>  | <b>26.0</b>  | <b>6.97</b>                                       | <b>-1.57</b>          |

**Table S2.** The film density measured by XRR and calculated theoretically of InON thin film respect to nitrogen reactant source. (Theoretical density : considering actual composition and reference density value of In<sub>2</sub>O<sub>3</sub> (7.18 g/cm<sup>3</sup>) and InN (6.81 g/cm<sup>3</sup>).
